# Supplementary material for: Intra- and inter-annual changes in isoprene emission from central Amazonia
Source: Copernicus journal article supplement (doi:10.5194/egusphere-2023-168), 2023-02-22
Supplement: Supplementary file 1 [file egusphere-2023-168-supplement.zip]

Archive with 4 entries (3 files):
- SI/
- SI/Supplementary Information.pdf
- SI/Table_S2.xlsx
- SI/Table_S3.xlsx
