# Supplementary material for: Intra- and inter-annual changes in isoprene emission from central Amazonia
Source: Copernicus journal article supplement (doi:10.5194/egusphere-2023-168), 2023-02-22
Supplement: Supplementary file 1 [file egusphere-2023-168-supplement.zip › SI/Supplementary Information.pdf]

## Supplementary Information

### Leaf demography and phenology - phenotype description

A complete description about the installation of the Phenocam on the tower, data collection, image selection and crown selection are given in Lopes et al. (2016) and Gonçalves et al. (2020). The camera monitors 194 upper canopy trees that are free of vines, and evident and massive flush events were observed for 69% of the 194, representing 134 trees. The definition of phenotypes of the 134 trees is:

1. Evergreen: tree crowns that remain green but have detectable flushes, with at least four over the sampling period (2013-2018).
2. Semi-evergreen: similar to evergreen, but flushing maximum three times over the entire sampling period (2013-2018).
3. Brevideciduous: tree crowns that have a brief abscised stage (bare) followed by flushing, approximately every year (2013-2018).
4. semi-brevideciduous: tree crowns that have a brief abscised stage (bare) followed by flushing, but the difference with brevideciduous is that the flushing-abscission dynamics is irregular.

The left 60 tree individuals did not present evident and massive flush events, and therefore it is assumed that they flush new leaves continuously across the year (Lopes et al., 2016).

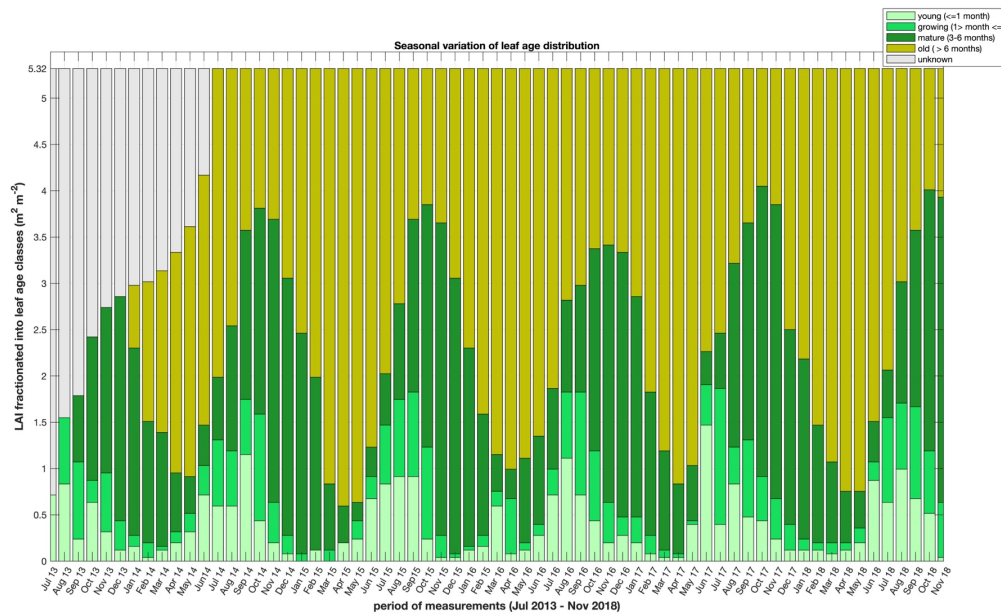

**Figure S1.** LAI fractionated into leaf age classes from July 2013 to November 2018.

## Tables

**Table S1:** Isoprene emission capacity across species and leaf ages (days after flushing). Values within brackets represent one standard deviation of mean.

| tree species                       | Isoprene<br>(mg m <sup>-2</sup> h <sup>-1</sup> ) | leaf age<br>(days) | leaf age<br>class* | emitter<br>category | height<br>(m) | date of<br>measurements |
|------------------------------------|---------------------------------------------------|--------------------|--------------------|---------------------|---------------|-------------------------|
| <i>Eschweilera amazonica</i>       | 2.79                                              | 61                 | mature             | medium              | 23            | Nov 3, 2017             |
| <i>Eschweilera bracteosa</i>       | 2.35                                              | 59                 | growing            | medium              | 24            | Nov 1, 2017             |
| <i>Stryphnodendron racemiferum</i> | 3.52                                              | 123                | mature             | medium              | 24            | Nov 3, 2017             |
| <i>Stryphnodendron racemiferum</i> | 3.30                                              | 425                | old                | medium              | 24            | Nov 2, 2017             |
| <i>Protium apiculatum</i>          | 2.26                                              | 121                | mature             | medium              | 24            | Nov 1, 2017             |
| <i>Protium apiculatum</i>          | 1.19                                              | 486                | old                | medium              | 24            | Nov 1, 2017             |
| <i>Protium guianense</i>           | 2.05                                              | 112                | mature             | medium              | 21            | Oct 22, 2017            |
| <i>Protium guianense</i>           | 0.83                                              | 414                | old                | medium              | 24            | Oct 23, 2017            |
| <i>Sacoglottis cf. guianensis</i>  | 1.48                                              | 112                | mature             | medium              | 24            | Oct 23, 2017            |
| <i>Sacoglottis cf. guianensis</i>  | 2.02                                              | 446                | old                | medium              | 24            | Oct 23, 2017            |
| <i>Gustavia elliptica</i>          | 0.56                                              | 116                | mature             | low                 | 22            | Oct 27, 2017            |
| <i>Gustavia elliptica</i>          | 0.60                                              | 295                | old                | low                 | 22            | Oct 27, 2017            |
| <i>Helicostylis tomentosa</i>      | not detected                                      | 20                 | young              | low                 | 26            | Oct 27, 2017            |
| <i>Helicostylis tomentosa</i>      | 0.49                                              | 143                | mature             | low                 | 26            | Oct 24, 2017            |
| <i>Eugenia cuspidifolia</i>        | 0.45                                              | 107                | mature             | low                 | 26            | Oct 18, 2017            |
| <i>Eugenia cuspidifolia</i>        | 0.08                                              | 409                | old                | low                 | 26            | Oct 18, 2017            |
| <i>Eschweilera cyathiformis</i>    | 0.30                                              | 122                | mature             | low                 | 30            | Nov 2, 2017             |
| <i>Eschweilera cyathiformis</i>    | 0.03                                              | 578                | old                | low                 | 30            | Nov 2, 2017             |
| <i>Symphonia globulifera</i>       | 0.13                                              | 138                | mature             | low                 | 26            | Oct 19, 2017            |
| <i>Symphonia globulifera</i>       | 0.08                                              | 258                | old                | low                 | 26            | Oct 19, 2017            |
| <i>morphotype 1</i>                | 0.12                                              | 79                 | mature             | low                 | 30            | Oct 21, 2017            |
| <i>morphotype 1</i>                | 0.07                                              | 475                | old                | low                 | 30            | Oct 21, 2017            |
|                                    |                                                   |                    | old                | not                 |               |                         |
| <i>Pouteria fimbriata</i>          | not detected                                      | 301                |                    | detected            | 26            | Nov 2, 2017             |
|                                    |                                                   |                    | old                | not                 |               |                         |
| <i>Mouriri cf. brevipes</i>        | not detected                                      | 414                |                    | detected            | 26            | Oct 23, 2017            |
|                                    | not detected                                      |                    | mature             | not                 |               |                         |
| <i>Chimarrhis turbinata</i>        |                                                   | 110                |                    | detected            | 26            | Oct 21, 2017            |

|                                   |              |     |        |              |    |              |
|-----------------------------------|--------------|-----|--------|--------------|----|--------------|
| <i>Chimarrhis turbinata</i>       | not detected | 475 | old    | not detected | 26 | Oct 21, 2017 |
| <i>Mouriri cf. dimorphandra</i>   | not detected | 15  | young  | not detected | 32 | Oct 19, 2017 |
| <i>Mouriri cf. dimorphandra</i>   | not detected | 108 | mature | not detected | 32 | Oct 19, 2017 |
| <i>Mouriri cf. dimorphandra</i>   | not detected | 503 | old    | not detected | 32 | Oct 19, 2017 |
| <i>Mouriri cf. duckeana</i>       | not detected | 82  | mature | not detected | 24 | Oct 24, 2017 |
| <i>Mouriri cf. duckeana</i>       | not detected | 415 | old    | not detected | 24 | Oct 24, 2017 |
| <i>Apeiba glabra</i>              | not detected | 17  | young  | not detected | 26 | Oct 21, 2017 |
| <i>Aspidosperma sandwithianum</i> | not detected | 123 | mature | not detected | 23 | Nov 3, 2017  |
| <i>Geissospermum argenteum</i>    | not detected | 23  | young  | not detected | 22 | Oct 27, 2017 |
| <i>Geissospermum argenteum</i>    | not detected | 358 | old    | not detected | 22 | Oct 27, 2017 |
| <i>Hymenaea courbaril</i> ***     | 0.06         | 0   | young  | high         |    | Sep 24, 1999 |
| <i>Hymenaea courbaril</i> ***     | 0.54         | 10  | young  | high         |    | Oct 04, 1999 |
| <i>Hymenaea courbaril</i> ***     | 0.68         | 11  | young  | high         |    | Oct 05, 1999 |
| <i>Hymenaea courbaril</i> ***     | 2.06         | 13  | young  | high         |    | Oct 07, 1999 |
| <i>Hymenaea courbaril</i> ***     | 11.17        | 28  | young  | high         |    | Oct 22, 1999 |
| <i>Hymenaea courbaril</i> ***     | 9.12         | 29  | young  | high         |    | Oct 23, 1999 |
| <i>Hymenaea courbaril</i> ***     | 5.60         | 226 | old    | high         |    | May 08, 1999 |
| <i>Hymenaea courbaril</i> ***     | 6.71         | 227 | old    | high         |    | May 09, 1999 |

\* leaf age classes: young leaves (0–1 month), growing (1–2 months), mature leaves (3–6 months), and old leaves (>6 months)

\*\* Fauset et al. (2015)

\*\*\*Measurements from the Southwestern Amazonia (Kuhn et al., 2004b)

Table S2: Tree species monitored with the phenocam installed on the INSTANT tower and the isoprene emission trait.

File: .xlsx

Table S3: Isoprene emission trait source. The isoprene emission trait was attributed according to literature, new measurements and imputed as in Taylor et al. (2018, 2019).

File: .xlsx
