# Supplementary material for: Intra- and inter-annual changes in isoprene emission from central Amazonia
Source: Copernicus journal article supplement (doi:10.5194/egusphere-2023-168), 2023-02-22
Supplement: Supplementary file 1 [file egusphere-2023-168-supplement.zip › SI/Table_S3.xlsx]

## Sheet: Meta
Column	Description
fam.scr, gen.scr, sp.scr	Taxonomic names 'scrubbed' (spelling errors corrected and taxonomic updates applied) by the Taxanomic Name Resolution Service (tnrs.biendata.org).
family.given, genus.given, species.given	Taxonomic names as provided in the original datasets.
isoprene	Species' isoprene emission status.
method	Detection method. 'distinguishing' = a gas-species distinguishing system like GC-MS. 'non-distinguishing' = a general volatile detection system that cannot distinguish isoprene from other volatiles, and is paired with a poorly controlled leaf cuvette such as branch bags. 'PORCO' = a non-distinguishing detection system with precision leaf cuvettes and low detection limit, distinguishing isoprene f…
botanic.garden.id	For species measured in botanic gardens using PORCO in the present study, this column indicates the garden (A. Duque private collection, FTBG = Fairchild Tropical Botanic Garden, JBC = Jardín Botánico de Cartagena, JBM = Jardín Botánico de Medellín, MBG = Montgomery Botanical Garden, UNM = Universidad Nacional de Medellín) followed by the tree identifier used by the garden if one was in use.
source.iso	Isoprene emission data source.

## Sheet: Data
fam.scr	gen.scr	sp.scr	family.given	genus.given	species.given	isoprene	method	botanic.garden.id	source.iso
Fabaceae	Andira	Andira inermis	NA	Andira	Andira inermis	emitter	PORCO	UNM-188	Present study, Tyeen Taylor
Malvaceae	Apeiba	Apeiba glabra	NA	NA	Apeiba glabra	non-emitter	distinguishing	NA	Present study, Eliane Alves
Apocynaceae	Aspidosperma	Aspidosperma desmanthum	NA	Aspidosperma	Aspidosperma desmanthum	non-emitter	PORCO	JBC	Present study, Tyeen Taylor
Apocynaceae	Aspidosperma	Aspidosperma sandwithianum	NA	NA	Aspidosperma sandwithianum	non-emitter	distinguishing	NA	Present study, Eliane Alves
Apocynaceae	Aspidosperma	Aspidosperma spruceanum	NA	Aspidosperma	Aspidosperma spruceanum	non-emitter	PORCO	JBM	Present study, Tyeen Taylor
Anacardiaceae	Astronium	Astronium fraxinifolium	NA	Astronium	Astronium fraxinifolium	emitter	PORCO	JBC	Present study, Tyeen Taylor
Anacardiaceae	Astronium	Astronium graveolens	Anacardiaceae	Astronium	Astronium graveolens	emitter	distinguishing	NA	Keller & Lerdau, 1999. Global Biogeochemical Cycles, 13:19-29
Moraceae	Brosimum	Brosimum alicastrum	NA	Brosimum	Brosimum alicastrum	emitter	PORCO	FTBG	Present study, Tyeen Taylor
Moraceae	Brosimum	Brosimum sp.Har2004.10	Moraceae	Brosimum	Brosimum sp.Har2004.10	non-emitter	distinguishing	NA	Harley et al., 2004. Global Change Biology, 10:630-650
Moraceae	Brosimum	Brosimum utile	NA	Brosimum	Brosimum utile	emitter	PORCO	JBM-3635	Present study, Tyeen Taylor
Calophyllaceae	Calophyllum	Calophyllum antillanum	NA	Calophyllum	Calophyllum calaba	emitter	PORCO	FTBG	Present study, Tyeen Taylor
Caryocaraceae	Caryocar	Caryocar glabrum	NA	Caryocar	Caryocar glabrum	non-emitter	PORCO	JBM-107	Present study, Tyeen Taylor
Rubiaceae	Chimarrhis	Chimarrhis turbinata	Rubiaceae	Chimarrhis	Chimarrhis turbinata	non-emitter	PORCO	NA	Taylor et al., 2021. Frontiers in Forests & Global Change
Sapotaceae	Chrysophyllum	Chrysophyllum argenteum	NA	Chrysophyllum	Chrysophyllum auratum	non-emitter	PORCO	FTBG	Present study, Tyeen Taylor
Sapotaceae	Chrysophyllum	Chrysophyllum cainito	NA	Chrysophyllum	Chrysophyllum cainito	non-emitter	PORCO	UNM-2186	Present study, Tyeen Taylor
Sapotaceae	Chrysophyllum	Chrysophyllum sp.Tay2018.2	Sapotaceae	Chrysophyllum	Chrysophyllum sp.Tay2018.2	non-emitter	distinguishing	NA	Taylor et al., 2018. New Phytologist, DOI.10.1111.nph.15304
Moraceae	Clarisia	Clarisia racemosa	NA	Clarisia	Clarisia racemosa	non-emitter	PORCO	JBM-919	Present study, Tyeen Taylor
Connaraceae	Connarus	Connarus perrottetii	Connaraceae	Connarus	Connarus perrottetii	emitter	PORCO	NA	Taylor et al., 2021. Frontiers in Forests & Global Change
Fabaceae	Copaifera	Copaifera multijuga	Caesalpinaceae	Copaifera	Copaifera multijuga	emitter	distinguishing	NA	Harley et al., 2004. Global Change Biology, 10:630-650
Lecythidaceae	Couratari	Couratari guianensis	Lecythidaceae	Couratari	Couratari guianensis	non-emitter	PORCO	NA	Taylor et al., 2021. Frontiers in Forests & Global Change
Lecythidaceae	Couratari	Couratari stellata	Lecythidaceae	Couratari	Couratari stellata	non-emitter	PORCO	NA	Taylor et al., 2021. Frontiers in Forests & Global Change
Euphorbiaceae	Croton	Croton matourensis	Euphorbiaceae	Croton	Croton matourensis	non-emitter	distinguishing	NA	Harley et al., 2004. Global Change Biology, 10:630-650
Sapotaceae	Ecclinusa	Ecclinusa guianensis	NA	NA	Ecclinusa guianensis	non-emitter	distinguishing	NA	Michelle Rezende, unpublished data In Review
Humiriaceae	Endopleura	Endopleura uchi	Humiriaceae	Endopleura	Endopleura uchi	emitter	distinguishing	NA	Harley et al., 2004. Global Change Biology, 10:630-650
Malvaceae	Eriotheca	Eriotheca longipedicellata	Malvaceae	Eriotheca	Eriotheca longipedicellata	emitter	PORCO	NA	Taylor et al., 2021. Frontiers in Forests & Global Change
Vochysiaceae	Erisma	Erisma uncinatum	Vochysiaceae	Erisma	Erisma uncinatum	non-emitter	distinguishing	NA	Harley et al., 2004. Global Change Biology, 10:630-650
Lecythidaceae	Eschweilera	Eschweilera amazonica	NA	NA	Eschweilera amazonica	emitter	distinguishing	NA	Present study, Eliane Alves
Lecythidaceae	Eschweilera	Eschweilera antioquensis	NA	Eschweilera	Eschweilera antioquensis	emitter	PORCO	A. Duque, private collection	Present study, Tyeen Taylor
Lecythidaceae	Eschweilera	Eschweilera apiculata	Lecythidaceae	Eschweilera	Eschweilera apiculata	emitter	PORCO	NA	Taylor et al., 2021. Frontiers in Forests & Global Change
Lecythidaceae	Eschweilera	Eschweilera bracteosa	NA	NA	Eschweilera bracteosa	emitter	distinguishing	NA	Present study, Eliane Alves
Lecythidaceae	Eschweilera	Eschweilera coriacea	Lecythidaceae	Eschweilera	Eschweilera odorata	emitter	distinguishing	NA	Harley et al., 2004. Global Change Biology, 10:630-650
Lecythidaceae	Eschweilera	Eschweilera cyathiformis	NA	NA	Eschweilera cyathiformis	emitter	distinguishing	NA	Present study, Eliane Alves
Lecythidaceae	Eschweilera	Eschweilera pedicellata	Lecythidaceae	Eschweilera	Eschweilera pedicellata	emitter	PORCO	NA	Taylor et al., 2021. Frontiers in Forests & Global Change
Lecythidaceae	Eschweilera	Eschweilera sp.Har2004.22	Lecythidaceae	Eschweilera	Eschweilera sp.Har2004.22	emitter	distinguishing	NA	Harley et al., 2004. Global Change Biology, 10:630-650
Lecythidaceae	Eschweilera	Eschweilera sp.Har2004.23	Lecythidaceae	Eschweilera	Eschweilera sp.Har2004.23	emitter	non-distinguishing	NA	Harley et al., 2004. Global Change Biology, 10:630-650
Lecythidaceae	Eschweilera	Eschweilera sp.Tay2021.2	Lecythidaceae	Eschweilera	Eschweilera sp.Tay2021.2	emitter	PORCO	NA	Taylor et al., 2021. Frontiers in Forests & Global Change
Myrtaceae	Eugenia	Eugenia axillaris	NA	Eugenia	Eugenia axillaris	emitter	PORCO	MBG-20050944*E	Present study, Tyeen Taylor
Myrtaceae	Eugenia	Eugenia cuspidifolia	NA	NA	Eugenia cuspidifolia	emitter	distinguishing	NA	Present study, Eliane Alves
Myrtaceae	Eugenia	Eugenia foetida	NA	Eugenia	Eugenia foetida	emitter	distinguishing	NA	Lerdau & Keller 1997. Plant Cell & Environment, 20:569-578
Myrtaceae	Eugenia	Eugenia rhombea	NA	Eugenia	Eugenia rhombea	emitter	PORCO	MBG-20060471*A	Present study, Tyeen Taylor
Myrtaceae	Eugenia	Eugenia sp.Har2004.24	Myrtaceae	Eugenia	Eugenia sp.Har2004.24	non-emitter	non-distinguishing	NA	Harley et al., 2004. Global Change Biology, 10:630-650
Myrtaceae	Eugenia	Eugenia xerophytica	NA	Eugenia	Eugenia xerophytica	emitter	distinguishing	NA	Lerdau & Keller 1997. Plant Cell & Environment, 20:569-578
Goupiaceae	Goupia	Goupia sp.Har2004.29	Celastraceae	Goupia	Goupia sp.Har2004.29	non-emitter	non-distinguishing	NA	Harley et al., 2004. Global Change Biology, 10:630-650
Moraceae	Helicostylis	Helicostylis tomentosa	NA	NA	Helicostylis tomentosa	emitter	distinguishing	NA	Present study, Eliane Alves
Fabaceae	Hymenaea	Hymenaea courbaril	Fabaceae	Hymenaea	Hymenaea courbaril	emitter	distinguishing	NA	Taylor et al., 2018. New Phytologist, DOI.10.1111.nph.15304
Fabaceae	Inga	Inga capitata	Mimosaceae	Inga	Inga capitata	emitter	distinguishing	NA	Harley et al., 2004. Global Change Biology, 10:630-650
Fabaceae	Inga	Inga cayennensis	Mimosaceae	Inga	Inga caynendensis	emitter	distinguishing	NA	Harley et al., 2004. Global Change Biology, 10:630-650
Fabaceae	Inga	Inga edulis	NA	Inga	Inga edulis	emitter	PORCO	UNM-1959	Present study, Tyeen Taylor
Fabaceae	Inga	Inga heterophylla	Mimosaceae	Inga	Inga heterophylla	emitter	non-distinguishing	NA	Harley et al., 2004. Global Change Biology, 10:630-650
Fabaceae	Inga	Inga rubiginosa	Fabaceae	Inga	Inga rubiginosa	emitter	distinguishing	NA	Taylor et al., 2021. Frontiers in Forests & Global Change
Fabaceae	Inga	Inga sp.Har2004.36	Mimosaceae	Inga	Inga sp.Har2004.36	emitter	non-distinguishing	NA	Harley et al., 2004. Global Change Biology, 10:630-650
Fabaceae	Inga	Inga sp.Har2004.37	Mimosaceae	Inga	Inga sp.Har2004.37	emitter	distinguishing	NA	Harley et al., 2004. Global Change Biology, 10:630-650
Fabaceae	Inga	Inga sp.Har2004.38	Mimosaceae	Inga	Inga sp.Har2004.38	emitter	distinguishing	NA	Harley et al., 2004. Global Change Biology, 10:630-650
Fabaceae	Inga	Inga sp.Har2004.39	Mimosaceae	Inga	Inga sp.Har2004.39	emitter	distinguishing	NA	Harley et al., 2004. Global Change Biology, 10:630-650
Fabaceae	Inga	Inga sp.Tay2021.3	Fabaceae	Inga	Inga sp.Tay2021.3	emitter	PORCO	NA	Taylor et al., 2021. Frontiers in Forests & Global Change
Fabaceae	Inga	Inga vera	Fabaceae	Inga	Inga vera	emitter	distinguishing	NA	Taylor et al., 2018. New Phytologist, DOI.10.1111.nph.15304
Lecythidaceae	Lecythis	Lecythis idatimon	Lecythidaceae	Lecythis	Lecythis idatimon	non-emitter	PORCO	NA	Taylor et al., 2021. Frontiers in Forests & Global Change
Lecythidaceae	Lecythis	Lecythis lurida	Lecythidaceae	Lecythis	Lecythis lurida	non-emitter	distinguishing	NA	Harley et al., 2004. Global Change Biology, 10:630-650
Lecythidaceae	Lecythis	Lecythis minor	NA	Lecythis	Lecythis minor	non-emitter	PORCO	JBC-2017-0356	Present study, Tyeen Taylor
Chrysobalanaceae	Licania	Licania sp.Har2004.40	Chrysobalanaceae	Licania	Licania sp.Har2004.40	non-emitter	distinguishing	NA	Harley et al., 2004. Global Change Biology, 10:630-650
Lauraceae	Licaria	Licaria triandra	NA	Licaria	Licaria triandra	non-emitter	PORCO	MBG-20050290*A	Present study, Tyeen Taylor
Fabaceae	Macrolobium	Macrolobium arenarium	Caesalpinaceae	Macrolobium	Macrolobium arenarium	non-emitter	non-distinguishing	NA	Harley et al., 2004. Global Change Biology, 10:630-650
Sapotaceae	Manilkara	Manilkara amazonica	Sapotaceae	Manilkara	Manilkara amazonica	non-emitter	non-distinguishing	NA	Harley et al., 2004. Global Change Biology, 10:630-650
Sapotaceae	Manilkara	Manilkara elata	Sapotaceae	Manilkara	Manilkara elata	non-emitter	PORCO	NA	Taylor et al., 2021. Frontiers in Forests & Global Change
Sapotaceae	Manilkara	Manilkara fouilloyana	Sapotaceae	Manilkara	Manilkara fouilloyana	non-emitter	non-distinguishing	NA	Klinger et al., 1998. Journal of Geophysical Research, 103:1443-1454
Sapotaceae	Manilkara	Manilkara hexandra	Sapotaceae	Manilkara	Manilkara hexandra	non-emitter	distinguishing	NA	Varshney & Singh, 2003. Journal of Geophysical Research, 108:ACH24-1-7
Sapotaceae	Manilkara	Manilkara zapota	NA	Manilkara	Manilkara zapota	non-emitter	PORCO	UNM-2185	Present study, Tyeen Taylor
Moraceae	Maquira	Maquira guianensis	Moraceae	Maquira	Maquira guianensis	emitter	PORCO	NA	Taylor et al., 2021. Frontiers in Forests & Global Change
Lauraceae	Mezilaurus	Mezilaurus itauba	Lauraceae	Mezilaurus	Mezilaurus itauba	non-emitter	PORCO	NA	Taylor et al., 2021. Frontiers in Forests & Global Change
Olacaceae	Minquartia	Minquartia guianensis	Olacaceae	Minquartia	Minquartia guianensis	emitter	PORCO	NA	Taylor et al., 2021. Frontiers in Forests & Global Change
Melastomataceae	Mouriri	Mouriri brachyanthera	Melastomataceae	Mouriri	Mouriri brachyanthera	non-emitter	PORCO	NA	Taylor et al., 2021. Frontiers in Forests & Global Change
Melastomataceae	Mouriri	Mouriri brevipes	NA	NA	Mouriri brevipes	non-emitter	distinguishing	NA	Present study, Eliane Alves
Melastomataceae	Mouriri	Mouriri dimorphandra	NA	NA	Mouriri dimorphandra	non-emitter	distinguishing	NA	Present study, Eliane Alves
Melastomataceae	Mouriri	Mouriri duckeana	NA	NA	Mouriri duckeana	non-emitter	distinguishing	NA	Present study, Eliane Alves
Myrtaceae	Myrcia	Myrcia sp.Har2004.45	Myrtaceae	Myrcia	Myrcia sp.Har2004.45	emitter	non-distinguishing	NA	Harley et al., 2004. Global Change Biology, 10:630-650
Myrtaceae	Myrcia	Myrcia zuzygium	NA	Myrcia	Myrcia zuzyium	emitter	PORCO	MBG-20040569*A	Present study, Tyeen Taylor
Nyctaginaceae	Neea	Neea oppositifolia	Nyctaginaceae	Neea	Neea oppositifolia	emitter	PORCO	NA	Taylor et al., 2021. Frontiers in Forests & Global Change
Lauraceae	Ocotea	Ocotea cujumary	Lauraceae	Ocotea	Ocotea cujumary	non-emitter	PORCO	NA	Taylor et al., 2021. Frontiers in Forests & Global Change
Lauraceae	Ocotea	Ocotea nigrescens	Lauraceae	Ocotea	Ocotea nigrescens	non-emitter	PORCO	NA	Taylor et al., 2021. Frontiers in Forests & Global Change
Lauraceae	Ocotea	Ocotea rubra	Lauraceae	Ocotea	Ocotea rubra	non-emitter	distinguishing	NA	Harley et al., 2004. Global Change Biology, 10:630-650
Lauraceae	Ocotea	Ocotea sp.Har2004.46	Lauraceae	Ocotea	Ocotea sp.Har2004.46	non-emitter	non-distinguishing	NA	Harley et al., 2004. Global Change Biology, 10:630-650
Lauraceae	Ocotea	Ocotea sp.Har2004.47	Lauraceae	Ocotea	Ocotea sp.Har2004.47	non-emitter	distinguishing	NA	Harley et al., 2004. Global Change Biology, 10:630-650
Lauraceae	Ocotea	Ocotea sp.Tay2021.4	Lauraceae	Ocotea	Ocotea sp.Tay2021.4	non-emitter	PORCO	NA	Taylor et al., 2021. Frontiers in Forests & Global Change
Lauraceae	Ocotea	Ocotea sp.Tay2021.5	Lauraceae	Ocotea	Ocotea sp.Tay2021.5	non-emitter	PORCO	NA	Taylor et al., 2021. Frontiers in Forests & Global Change
Chrysobalanaceae	Parinari	Parinari excelsa	NA	NA	Parinari escelsa	emitter	distinguishing	NA	Michelle Rezende, unpublished data In Review
Fabaceae	Parkia	Parkia sp.Har2004.51	Mimosaceae	Parkia	Parkia sp.Har2004.51	non-emitter	non-distinguishing	NA	Harley et al., 2004. Global Change Biology, 10:630-650
Urticaceae	Pourouma	Pourouma bicolor	Urticaceae	Pourouma	Pourouma bicolor	non-emitter	distinguishing	NA	Geron et al., 2002. Atmospheric Environment, 36:3793-3802
Sapotaceae	Pouteria	Pouteria fimbriata	NA	NA	Pouteria fimbriata	non-emitter	distinguishing	NA	Present study, Eliane Alves
Sapotaceae	Pouteria	Pouteria glomerata	Sapotaceae	Pouteria	Pouteria glomerata	non-emitter	distinguishing	NA	Bracho-Nunez et al., 2013. Biogeosciences, 10:5855-5873
Sapotaceae	Pouteria	Pouteria grandiflora	Sapotaceae	Pouteria	Pouteria grandiflora	non-emitter	non-distinguishing	NA	Klinger et al., 2002. Journal of Geophysical Research-Atmospheres, 107:4603
Sapotaceae	Pouteria	Pouteria macrophylla	Sapotaceae	Pouteria	Pouteria macrophylla	non-emitter	PORCO	NA	Taylor et al., 2021. Frontiers in Forests & Global Change
Sapotaceae	Pouteria	Pouteria sp.Har2004.52	Sapotaceae	Pouteria	Pouteria sp.Har2004.52	non-emitter	non-distinguishing	NA	Harley et al., 2004. Global Change Biology, 10:630-650
Sapotaceae	Pouteria	Pouteria sp.Har2004.53	Sapotaceae	Pouteria	Pouteria sp.Har2004.53	non-emitter	distinguishing	NA	Harley et al., 2004. Global Change Biology, 10:630-650
Sapotaceae	Pouteria	Pouteria sp.Har2004.54	Sapotaceae	Pouteria	Pouteria sp.Har2004.54	non-emitter	distinguishing	NA	Harley et al., 2004. Global Change Biology, 10:630-650
Sapotaceae	Pouteria	Pouteria torta	NA	Pouteria	Pouteria torta	non-emitter	PORCO	JBM	Present study, Tyeen Taylor
Burseraceae	Protium	Protium altissimum	Burseraceae	Tetragastris	Tetragastris altissima	emitter	distinguishing	NA	Harley et al., 2004. Global Change Biology, 10:630-650
Burseraceae	Protium	Protium apiculatum	NA	NA	Protium apiculatum	emitter	distinguishing	NA	Present study, Eliane Alves
Burseraceae	Protium	Protium decandrum	Burseraceae	Protium	Protium decandrum	emitter	PORCO	NA	Taylor et al., 2021. Frontiers in Forests & Global Change
Burseraceae	Protium	Protium guianense	NA	NA	Protium guianense	emitter	distinguishing	NA	Present study, Eliane Alves
Burseraceae	Protium	Protium heterophyllum	Burseraceae	Protium	Protium heterophyllum	emitter	distinguishing	NA	Harley et al., 2004. Global Change Biology, 10:630-650
Burseraceae	Protium	Protium opacum	Burseraceae	Protium	Protium opacum	emitter	distinguishing	NA	Harley et al., 2004. Global Change Biology, 10:630-650
Burseraceae	Protium	Protium pittieri	Burseraceae	Protium	Protium pittieri	emitter	distinguishing	NA	Geron et al., 2002. Atmospheric Environment, 36:3793-3802
Burseraceae	Protium	Protium polybotryum	Burseraceae	Protium	Protium polybotrym	emitter	distinguishing	NA	Harley et al., 2004. Global Change Biology, 10:630-650
Burseraceae	Protium	Protium sp.Har2004.55	Burseraceae	Protium	Protium sp.Har2004.55	emitter	non-distinguishing	NA	Harley et al., 2004. Global Change Biology, 10:630-650
Burseraceae	Protium	Protium sp.Har2004.56	Burseraceae	Protium	Protium sp.Har2004.56	emitter	non-distinguishing	NA	Harley et al., 2004. Global Change Biology, 10:630-650
Burseraceae	Protium	Protium sp.Tay2021.6	Burseraceae	Protium	Protium sp.Tay2021.6	emitter	PORCO	NA	Taylor et al., 2021. Frontiers in Forests & Global Change
Burseraceae	Protium	Protium subserratum	Burseraceae	Protium	Protium subserratum	non-emitter	distinguishing	NA	Harley et al., 2004. Global Change Biology, 10:630-650
Violaceae	Rinorea	Rinorea guianensis	Violaceae	Rinorea	Rinorea guianensis	non-emitter	distinguishing	NA	Harley et al., 2004. Global Change Biology, 10:630-650
Proteaceae	Roupala	Roupala montana	NA	Roupala	Roupala montana	emitter	PORCO	JBM	Present study, Tyeen Taylor
Malvaceae	Scleronema	Scleronema micranthum	Malvaceae	Scleronema	Scleronema micranthum	non-emitter	distinguishing	NA	Bracho-Nunez et al., 2013. Biogeosciences, 10:5855-5873
Malvaceae	Sterculia	Sterculia lanceolata	Sterculiaceae	Sterculia	Sterculia lanceolata	non-emitter	non-distinguishing	NA	Klinger et al., 2002. Journal of Geophysical Research-Atmospheres, 107:4603
Malvaceae	Sterculia	Sterculia rhinopetala	Sterculiaceae	Sterculia	Sterculia rhinopetala	non-emitter	non-distinguishing	NA	Klinger et al., 1998. Journal of Geophysical Research, 103:1443-1454
Malvaceae	Sterculia	Sterculia tragacantha	Sterculiaceae	Sterculia	Sterculia tragacantha	non-emitter	non-distinguishing	NA	Klinger et al., 1998. Journal of Geophysical Research, 103:1443-1454
Fabaceae	Stryphnodendron	Stryphnodendron racemiferum	NA	NA	Stryphnodendron racemiferum	emitter	distinguishing	NA	Present study, Eliane Alves
Fabaceae	Swartzia	Swartzia laurifolia	Fabaceae	Swartzia	Swartzia laurifolia	emitter	PORCO	NA	Taylor et al., 2021. Frontiers in Forests & Global Change
Fabaceae	Swartzia	Swartzia robiniifolia	NA	Swartzia	Swartzia robiniifolia	emitter	PORCO	UNM-514	Present study, Tyeen Taylor
Fabaceae	Swartzia	Swartzia sp.Har2004.66	Papilionaceae	Swartzia	Swartzia sp.Har2004.66	emitter	distinguishing	NA	Harley et al., 2004. Global Change Biology, 10:630-650
Fabaceae	Swartzia	Swartzia sp.Har2004.67	Papilionaceae	Swartzia	Swartzia sp.Har2004.67	emitter	distinguishing	NA	Harley et al., 2004. Global Change Biology, 10:630-650
Fabaceae	Tachigali	Tachigali chrysophylla	Fabaceae	Tachigali	Tachigali chrysophylla	non-emitter	distinguishing	NA	Taylor et al., 2021. Frontiers in Forests & Global Change
Fabaceae	Tachigali	Tachigali sp.Har2004.70	Cecropiaceae	Tachigali	Tachigali sp.Har2004.70	non-emitter	distinguishing	NA	Harley et al., 2004. Global Change Biology, 10:630-650
Sapindaceae	Talisia	Talisia esculenta	NA	Talisia	Talisia esculenta	non-emitter	PORCO	MBG-89294*C	Present study, Tyeen Taylor
Sapindaceae	Talisia	Talisia retusa	Sapindaceae	Talisia	Talisia retusa	non-emitter	distinguishing	NA	Harley et al., 2004. Global Change Biology, 10:630-650
Combretaceae	Terminalia	Terminalia arjuna	Combretaceae	Terminalia	Terminalia arjuna	non-emitter	distinguishing	NA	Varshney & Singh, 2003. Journal of Geophysical Research, 108:ACH24-1-7
Combretaceae	Terminalia	Terminalia bellirica	Combretaceae	Terminalia	Terminalia bellirica	non-emitter	distinguishing	NA	Padhy & Varshney, 2005. Environmental Pollution, 135:101-109
Combretaceae	Terminalia	Terminalia buceras	NA	Bucida	Bucida buceras	non-emitter	distinguishing	NA	Lerdau & Keller 1997. Plant Cell & Environment, 20:569-578
Combretaceae	Terminalia	Terminalia catappa	Combretaceae	Terminalia	Terminalia catappa	non-emitter	distinguishing	NA	Tambunan et al., 2006. Chemosphere, 65:2138-2144
Combretaceae	Terminalia	Terminalia mantaly	Combretaceae	Terminalia	Terminalia mantaly	non-emitter	non-distinguishing	NA	Klinger et al., 1998. Journal of Geophysical Research, 103:1443-1454
Combretaceae	Terminalia	Terminalia myriocarpa	Combretaceae	Terminalia	Terminalia myriocarpa	non-emitter	distinguishing	NA	Klinger et al., 2002. Journal of Geophysical Research-Atmospheres, 107:4603
Combretaceae	Terminalia	Terminalia sp.Har2004.11	Combretaceae	Buchenavia	Buchenavia sp.Har2004.11	non-emitter	non-distinguishing	NA	Harley et al., 2004. Global Change Biology, 10:630-650
Combretaceae	Terminalia	Terminalia superba	Combretaceae	Terminalia	Terminalia superba	non-emitter	distinguishing	NA	Klinger et al., 1998. Journal of Geophysical Research, 103:1443-1454
Fabaceae	Vatairea	Vatairea guianensis	Fabaceae	Vatairea	Vatairea guianensis	emitter	distinguishing	NA	Bracho-Nunez et al., 2013. Biogeosciences, 10:5855-5873
Myristicaceae	Virola	Virola elongata	Myristicaceae	Virola	Virola elongata	non-emitter	PORCO	NA	Taylor et al., 2021. Frontiers in Forests & Global Change
Myristicaceae	Virola	Virola michelii	Myristicaceae	Virola	Virola michelii	emitter	PORCO	NA	Taylor et al., 2021. Frontiers in Forests & Global Change
Myristicaceae	Virola	Virola pavonis	Myristicaceae	Virola	Virola pavonis	non-emitter	non-distinguishing	NA	Harley et al., 2004. Global Change Biology, 10:630-650
Myristicaceae	Virola	Virola sebifera	Myristicaceae	Virola	Virola sebifera	emitter	distinguishing	NA	Geron et al., 2002. Atmospheric Environment, 36:3793-3802
Fabaceae	Zygia	Zygia racemosa	Mimosaceae	Marmaroxylon	Marmaroxylon racemosum	non-emitter	distinguishing	NA	Harley et al., 2004. Global Change Biology, 10:630-650
