# Supplementary material for: Intra- and inter-annual changes in isoprene emission from central Amazonia
Source: Copernicus journal article supplement (doi:10.5194/egusphere-2023-168), 2023-02-22
Supplement: Supplementary file 1 [file Table_S2.xlsx]

## Sheet: Meta
Column	Description
species.given	Species name as it occurs in the phenology dataset
fam.scr, gen.scr, sp.scr	Taxonomic names 'scrubbed' (spelling errors corrected and taxonomic updates applied) by the Taxanomic Name Resolution Service (tnrs.biendata.org)
isoprene	Best estimate of each species' emission status (emitter or non-emitter), either based on direct matches to measured species, or based on pIE (emitter = pIE ≥ 2/3; non-emitter = pIE ≤ 1/3)
pIE	Proportion of species in a given genus that emit isoprene. Provided only where 'isoprene.data.type' for a given species equals 'genus average'.
n.spp.in.gen.avg	Number of species that informed a genus average (pIE).
isoprene.data.type	Whether the source of isoprene data assigned to a given species comes from measurements of the same species or from other species in the same genus (genus average).

## Sheet: Data
fam.scr	gen.scr	sp.scr	species.given	isoprene	pIE	n.spp.in.gen.avg	isoprene.data.type
Lecythidaceae	Allantoma	Allantoma decandra	Allantoma decandra	NA	NA	NA	NA
Fabaceae	Andira	Andira micrantha	Andira micrantha	emitter	1	1	genus average
Malvaceae	Apeiba	Apeiba glabra	Apeiba glabra	non-emitter	0	NA	species
Apocynaceae	Aspidosperma	Aspidosperma excelsum	Aspidosperma excelsum	non-emitter	0	3	genus average
Apocynaceae	Aspidosperma	Aspidosperma sandwithianum	Aspidosperma sandwithianum	non-emitter	0	NA	species
Anacardiaceae	Astronium	Astronium lecointei	Astronium lecointei	emitter	1	2	genus average
Fabaceae	Balizia	Balizia elegans	Balizia elegans	NA	NA	NA	NA
Fabaceae	Batesia	Batesia floribunda	Batesia floribunda	NA	NA	NA	NA
Moraceae	Brosimum	Brosimum parinarioides	Brosimum parinarioides	emitter	0.666667	3	genus average
Calophyllaceae	Calophyllum	Calophyllum antillanum	Calophyllum brasiliense	emitter	1	NA	species
Myrtaceae	Calyptranthes	Calyptranthes forsteri	Calyptranthes forsteri	NA	NA	NA	NA
Lecythidaceae	Cariniana	Cariniana decandra	Cariniana decandra	NA	NA	NA	NA
Lecythidaceae	Cariniana	Cariniana micrantha	Cariniana micrantha	NA	NA	NA	NA
Caryocaraceae	Caryocar	Caryocar glabrum	Caryocar glabrum	non-emitter	0	NA	species
Rubiaceae	Chimarrhis	Chimarrhis turbinata	Chimarrhis turbinata	non-emitter	0	NA	species
Sapotaceae	Chrysophyllum	Chrysophyllum argenteum	Chrysophyllum argenteum	non-emitter	0	NA	species
Sapotaceae	Chrysophyllum	Chrysophyllum prieurii	Chrysophyllum prieurii	non-emitter	0	3	genus average
Moraceae	Clarisia	Clarisia racemosa	Clarisia racemosa	non-emitter	0	NA	species
Connaraceae	Connarus	Connarus perrottetii	Connarus perrotteti	emitter	1	NA	species
Fabaceae	Copaifera	Copaifera multijuga	Copaifera multijuga	emitter	1	NA	species
Lecythidaceae	Couratari	Couratari longipedicellata	Couratari longipedicellata	non-emitter	0	2	genus average
Lecythidaceae	Couratari	Couratari stellata	Couratari stellata	non-emitter	0	NA	species
Euphorbiaceae	Croton	Croton matourensis	Croton matourensis	non-emitter	0	NA	species
Fabaceae	Dinizia	Dinizia excelsa	Dinizia excelsa	NA	NA	NA	NA
Humiriaceae	Duckesia	Duckesia verrucosa	Duckesia verrucosa	NA	NA	NA	NA
Rubiaceae	Duroia	Duroia macrophylla	Duroia macrophylla	NA	NA	NA	NA
Sapotaceae	Ecclinusa	Ecclinusa guianensis	Ecclinussa guianensis	non-emitter	0	NA	species
Humiriaceae	Endopleura	Endopleura uchi	Endopleura uchi	emitter	1	NA	species
Fabaceae	Eperua	Eperua glabriflora	Eperua glabriflora	NA	NA	NA	NA
Malvaceae	Eriotheca	Eriotheca globosa	Eriotheca globosa	emitter	1	1	genus average
Vochysiaceae	Erisma	Erisma fuscum	Erisma fuscum	emitter	1	1	genus average
Vochysiaceae	Erisma	Erisma bicolor	Erisma bicolor	emitter	1	1	genus average
Lecythidaceae	Eschweilera	Eschweilera bracteosa	Eschweilera bracteosa	emitter	1	NA	species
Lecythidaceae	Eschweilera	Eschweilera cyathiformis	Eschweilera cyathiformis	emitter	1	NA	species
Lecythidaceae	Eschweilera	Eschweilera pseudodecolorans	Eschweilera pseudodecolorans	emitter	1	10	genus average
Lecythidaceae	Eschweilera	Eschweilera pedicellata	Eschweilera pedicellata	emitter	1	NA	species
Lecythidaceae	Eschweilera	Eschweilera rhododendrifolia	Eschweilera rhododendrifolia	emitter	1	10	genus average
Lecythidaceae	Eschweilera	Eschweilera decolorans	Eschweilera decolorans	emitter	1	10	genus average
Lecythidaceae	Eschweilera	Eschweilera coriacea	Eschweilera coriacea	emitter	1	NA	species
Lecythidaceae	Eschweilera	Eschweilera micrantha	Eschweilera micrantha	emitter	1	10	genus average
Myrtaceae	Eugenia	Eugenia cuspidifolia	Eugenia cuspidifolia	emitter	1	NA	species
Myrtaceae	Eugenia	Eugenia florida	Eugenia florida	emitter	0.833333	6	genus average
Goupiaceae	Goupia	Goupia glabra	Goupia glabra	non-emitter	0	1	genus average
Bignoniaceae	Handroanthus	Handroanthus capitatus	Handroanthus capitatus	NA	NA	NA	NA
Moraceae	Helicostylis	Helicostylis tomentosa	Helicostylis tomentosa	emitter	1	NA	species
Chrysobalanaceae	Hirtella	Hirtella suffulta	Hirtella suffulta	NA	NA	NA	NA
Fabaceae	Hymenaea	Hymenaea parvifolia	Hymenaea parvifolia	emitter	1	1	genus average
Fabaceae	Inga	Inga paraensis	Inga paraensis	emitter	1	11	genus average
Fabaceae	Inga	Inga laurina	Inga laurina	emitter	1	11	genus average
Lecythidaceae	Lecythis	Lecythis sp.phen.1	Lecythis sp.2	non-emitter	0	3	genus average
Lecythidaceae	Lecythis	Lecythis parvifructa	Lecythis parvifructa	non-emitter	0	3	genus average
Lecythidaceae	Lecythis	Lecythis gracieana	Lecythis gracieana	non-emitter	0	3	genus average
Chrysobalanaceae	Licania	Licania oblongifolius	Licania oblongifolia	non-emitter	0	1	genus average
Chrysobalanaceae	Licania	Licania heteromorphus	Licania heteromorpha	non-emitter	0	1	genus average
Lauraceae	Licaria	Licaria chrysophylla	Licaria chrysophylla	non-emitter	0	1	genus average
Fabaceae	Limadendron	Limadendron amazonicum	Poecilanthe amazonica	NA	NA	NA	NA
Fabaceae	Macrolobium	Macrolobium microcalyx	Macrolobium microcalyx	non-emitter	0	1	genus average
Sapotaceae	Manilkara	Manilkara huberi	Manilkara huberi	non-emitter	0	5	genus average
Sapotaceae	Manilkara	Manilkara bidentata	Manilkara bidentata	non-emitter	0	5	genus average
Moraceae	Maquira	Maquira guianensis	Maquira guianensis	emitter	1	NA	species
Sapindaceae	Matayba	Matayba spruceana	Matayba spruceana	NA	NA	NA	NA
Lauraceae	Mezilaurus	Mezilaurus synandra	Mezilaurus synandra	non-emitter	0	1	genus average
Lauraceae	Mezilaurus	Mezilaurus duckei	Mezilaurus duckei	non-emitter	0	1	genus average
Euphorbiaceae	Micrandropsis	Micrandropsis scleroxylon	Micrandropsis scleroxylon	NA	NA	NA	NA
Sapotaceae	Micropholis	Micropholis egensis	Micropholis egensis	NA	NA	NA	NA
Sapotaceae	Micropholis	Micropholis casiquiarensis	Micropholis casiquiarensis	NA	NA	NA	NA
Olacaceae	Minquartia	Minquartia guianensis	Minquartia guianensis	emitter	1	NA	species
Fabaceae	Monopteryx	Monopteryx inpae	Monopteryx inpae	NA	NA	NA	NA
Clusiaceae	Moronobea	Moronobea pulchra	Moronobea pulchra	NA	NA	NA	NA
Melastomataceae	Mouriri	Mouriri brevipes	Mouriri brevipes	non-emitter	0	NA	species
Melastomataceae	Mouriri	Mouriri collocarpa	Mouriri collocarpa	non-emitter	0	4	genus average
Melastomataceae	Mouriri	Mouriri sagotiana	Mouriri sagotiana	non-emitter	0	4	genus average
Melastomataceae	Mouriri	Mouriri duckeana	Mouriri duckeana	non-emitter	0	NA	species
Myrtaceae	Myrcia	Myrcia fallax	Myrcia fallax	emitter	1	2	genus average
Nyctaginaceae	Neea	Neea madeirana	Neea madeirana	emitter	1	1	genus average
Lauraceae	Ocotea	Ocotea cujumary	Ocotea cujumary	non-emitter	0	NA	species
Lauraceae	Ocotea	Ocotea cinerea	Ocotea cinerea	non-emitter	0	7	genus average
Lauraceae	Ocotea	Ocotea oblonga	Ocotea oblonga	non-emitter	0	7	genus average
Fabaceae	Paloue	Paloue durissima	Elizabetha durissima	NA	NA	NA	NA
Chrysobalanaceae	Parinari	Parinari parvifolia	Parinari parvifolia	emitter	1	1	genus average
Fabaceae	Parkia	Parkia multijuga	Parkia multijuga	non-emitter	0	1	genus average
Fabaceae	Parkia	Parkia pendula	Parkia pendula	non-emitter	0	1	genus average
Fabaceae	Peltogyne	Peltogyne catingae	Peltogyne catingae	NA	NA	NA	NA
Fabaceae	Peltogyne	Peltogyne paniculata	Peltogyne paniculata	NA	NA	NA	NA
Urticaceae	Pourouma	Pourouma guianensis	Pourouma guianensis	non-emitter	0	1	genus average
Sapotaceae	Pouteria	Pouteria anomala	Pouteria anomala	non-emitter	0	8	genus average
Sapotaceae	Pouteria	Pouteria guianensis	Pouteria guianensis	non-emitter	0	8	genus average
Sapotaceae	Pouteria	Pouteria manaosensis	Pouteria manaosensis	non-emitter	0	8	genus average
Sapotaceae	Pouteria	Pouteria bilocularis	Pouteria bilocularis	non-emitter	0	8	genus average
Sapotaceae	Pouteria	Pouteria laevigata	Pouteria laevigata	non-emitter	0	8	genus average
Sapotaceae	Pouteria	Pouteria engleri	Pouteria engleri	non-emitter	0	8	genus average
Sapotaceae	Pouteria	Pouteria retinervis	Pouteria retinervis	non-emitter	0	8	genus average
Sapotaceae	Pouteria	Pouteria erythrochrysa	Pouteria erythrochrysa	non-emitter	0	8	genus average
Sapotaceae	Pouteria	Pouteria eugeniifolia	Pouteria eugeniifolia	non-emitter	0	8	genus average
Sapotaceae	Pouteria	Pouteria macrophylla	Pouteria macrophylla	non-emitter	0	NA	species
Sapotaceae	Pouteria	Pouteria durlandii	Pouteria durlandii	non-emitter	0	8	genus average
Sapotaceae	Pouteria	Pouteria reticulata	Pouteria reticulata	non-emitter	0	8	genus average
Sapotaceae	Pouteria	Pouteria cladantha	Pouteria cladanta	non-emitter	0	8	genus average
Burseraceae	Protium	Protium hebetatum	Protium hebetatum	emitter	0.916667	12	genus average
Burseraceae	Protium	Protium paniculatum	Protium paniculatum	emitter	0.916667	12	genus average
Burseraceae	Protium	Protium spruceanum	Protium spruceanum	emitter	0.916667	12	genus average
Burseraceae	Protium	Protium altsonii	Protium altsonii	emitter	0.916667	12	genus average
Ochnaceae	Quiina	Quiina sp.phen.2	Quiina sp.1	NA	NA	NA	NA
Lauraceae	Rhodostemonodaphne	Rhodostemonodaphne grandis	Rodostemonodaphne grandis	NA	NA	NA	NA
Violaceae	Rinorea	Rinorea guianensis	Rinorea guianensis	non-emitter	0	NA	species
Linaceae	Roucheria	Roucheria columbiana	Roucheria columbiana	NA	NA	NA	NA
Proteaceae	Roupala	Roupala nitida	Roupala nitida	emitter	1	1	genus average
Malvaceae	Scleronema	Scleronema micranthum	Scleronema micranthum	non-emitter	0	NA	species
Elaeocarpaceae	Sloanea	Sloanea floribunda	Sloanea floribunda	NA	NA	NA	NA
Malvaceae	Sterculia	Sterculia excelsa	Sterculia excelsa	non-emitter	0	3	genus average
Fabaceae	Stryphnodendron	Stryphnodendron racemiferum	Stryphnodendron racemiferum	emitter	1	NA	species
Fabaceae	Swartzia	Swartzia tessmannii	Swartzia tessmannii	emitter	1	4	genus average
Fabaceae	Swartzia	Swartzia recurva	Swartzia recurva	emitter	1	4	genus average
Fabaceae	Tachigali	Tachigali alba	Tachigali alba	non-emitter	0	2	genus average
Fabaceae	Tachigali	Tachigali micropetala	Tachigali micropetala	non-emitter	0	2	genus average
Fabaceae	Tachigali	Tachigali sp.phen.3	Tachigali sp.1	non-emitter	0	2	genus average
Fabaceae	Tachigali	Tachigali melanocarpa	Tachigali melanocarpa	non-emitter	0	2	genus average
Sapindaceae	Talisia	Talisia sp.phen.4	Talisia sp.	non-emitter	0	2	genus average
Fabaceae	Taralea	Taralea cordata	Taralea cordata	NA	NA	NA	NA
Combretaceae	Terminalia	Terminalia grandis	Buchenavia grandis	non-emitter	0	8	genus average
Combretaceae	Terminalia	Terminalia amazonia	Terminalia amazonia	non-emitter	0	8	genus average
Burseraceae	Trattinnickia	Trattinnickia boliviana	Trattinnickia boliviana	NA	NA	NA	NA
Fabaceae	Vatairea	Vatairea sp.phen.5	Vatairea_sp.	emitter	1	1	genus average
Fabaceae	Vataireopsis	Vataireopsis speciosa	Vataireopsis speciosa	NA	NA	NA	NA
Myristicaceae	Virola	Virola guggenheimii	Virola guggenheimii	NA	0.5	4	genus average
Myristicaceae	Virola	Virola michelii	Virola michelii	emitter	1	NA	species
Fabaceae	Zygia	Zygia racemosa	Zygia racemosa	non-emitter	0	NA	species
